# Supplementary material
Source: HighWire-hosted journal article supplement (https://erj.ersjournals.com/highwire/filestream/131495/field_highwire_adjunct_files/0/ERJ-00474-2016_Supplement.pdf)
Supplement: ERJ-00474-2016_Supplement.pdf [file ERJ-00474-2016_Supplement.pdf]

# Supplementary Material

## **Pathogen- and antibiotic-specific effects of prednisone in community-acquired pneumonia**

Sebastian A. Wirz<sup>1\*</sup>, Claudine A. Blum<sup>2,3\*</sup>, Philipp Schuetz,<sup>3</sup> Werner C. Albrich<sup>4</sup>, Christoph Noppen<sup>5</sup>, Beat Mueller<sup>6</sup>, Mirjam Christ-Crain<sup>2\*</sup>, Philip E. Tarr<sup>1\*</sup>, for the STEP Study Group<sup>\*\*</sup>

### **Supplementary Methods**

#### **Nasopharyngeal swabs, nucleic acid extraction, multiplex viral PCR.**

Total nucleic acids were extracted from 489 nasopharyngeal swabs (eswab, Copan) between November 2011 and May 2014 by taking advantage the NucliSens miniMAG platform with the NucliSens magnetic extraction reagents (bioMérieux) according to the instructions of the manufacturer. Elution of these nucleic acid extracts was done in 20 µl. Amplification was performed using the Resplex v2 (Luminex technology, Qiagen, Hilden, Germany) and Anyplex II RV16 multiplex real-time RT-PCR test (Seegene, Seoul, South Korea) targeting influenza A, influenza B, parainfluenzavirus 1-3 (PIV), respiratory syncytial virus A and B (RSV A, RSV B), adenovirus (AdV), human rhinoviruses (HRVA/B/C), human coronaviruses (CoV 229E, OC43, NL69), human enterovirus (HEV), human metapneumovirus (MPV) and human bocavirus (HBoV).

## **Supplementary Table S1. Primary and secondary outcomes**

### **1. Analysis by microbiological diagnosis**

## Pneumococcal Pneumonia

|                                                        | Pneumococcal Pneumonia     |                    |                                                                                                      | All others                 |                    |                                                                                                          |                                        |
|--------------------------------------------------------|----------------------------|--------------------|------------------------------------------------------------------------------------------------------|----------------------------|--------------------|----------------------------------------------------------------------------------------------------------|----------------------------------------|
| Endpoints                                              | Predni-<br>sone<br>(n= 53) | Placebo<br>(n=53)  | HR, OR or difference<br>(95% CI)                                                                     | Predni-<br>sone<br>(n=250) | Placebo<br>(n=268) | HR, OR or difference (95% CI)                                                                            | Interaction p-value                    |
| <b>Primary Endpoint</b>                                |                            |                    |                                                                                                      |                            |                    |                                                                                                          |                                        |
| Per protocol, time to clinical stability, median (IQR) | 3.4<br>(1.5 - 8.5)         | 3.6<br>(2.0 - 5.9) | Unadjusted HR 0.97<br>(0.65 - 1.43)<br>Adjusted HR 1.28<br>(0.85 - 1.94)                             | 3<br>(2.0 - 5.3)           | 5<br>(2.5 - 8.3)   | Unadjusted HR 1.48<br>(1.24 - 1.77)<br>Adjusted HR 1.48<br>(1.24 - 1.77)                                 | Unadjusted: 0.04<br><br>Adjusted: 0.14 |
| <b>Secondary Endpoints</b>                             |                            |                    |                                                                                                      |                            |                    |                                                                                                          |                                        |
| Time to effective hospital discharge                   | 8.8 (6.0)                  | 7.5 (5.5)          | Unadjusted difference<br>1.26 days (-0.95 - 3.48)<br>Adjusted difference<br>0.34 days (-1.61 - 2.30) | 8.0 (6.0)                  | 9.0 (6.1)          | Unadjusted difference -1.02<br>days (-2.07 - 0.03)<br>Adjusted difference -1.24 days<br>(-2.22 - -0.26)  | Unadjusted: 0.08<br><br>Adjusted: 0.16 |
| Death from any cause                                   | 1 (2%)                     | 3 (6%)             | Unadjusted OR 0.32<br>(0.03 - 3.18)<br>Adjusted OR 0.09<br>(0.005 - 1.48)                            | 10 (4.0%)                  | 10 (3.7%)          | Unadjusted OR 1.08 (0.44 -<br>2.63)<br>Adjusted OR 0.79<br>(0.30 - 2.12)                                 | Unadjusted: 0.34<br><br>Adjusted: 0.28 |
| ICU admission                                          | 6 (11%)                    | 2 (4%)             | Unadjusted OR 3.26<br>(0.63 - 16.93)<br>Adjusted OR 3.88<br>(0.53 - 28.19)                           | 7 (2.8%)                   | 13 (4.9%)          | Unadjusted OR 0.57 (0.22 -<br>1.44)<br>Adjusted OR 0.48<br>(0.17 - 1.36)                                 | Unadjusted: 0.07<br><br>Adjusted: 0.05 |
| Re-hospitalization                                     | 5 (9%)                     | 2 (4%)             | Unadjusted OR 2.66<br>(0.49 - 14.35)<br>Adjusted OR 2.45<br>(0.43 - 13.94)                           | 23 (9.2%)                  | 22 (8.2%)          | Unadjusted OR 1.13 (0.61 -<br>2.09)<br>Adjusted OR 1.07<br>(0.57 - 1.99)                                 | Unadjusted: 0.35<br><br>Adjusted: 0.51 |
| CAP complications                                      | 2 (4%)                     | 3 (6%)             | Unadjusted OR 0.65<br>(0.10 - 4.08)<br>Adjusted OR 0.46<br>(0.06 - 3.49)                             | 6 (2.4%)                   | 14 (5.2%)          | Unadjusted OR 0.45 (0.17 -<br>1.18)<br>Adjusted OR 0.39<br>(0.14 - 1.06)                                 | Unadjusted: 0.72<br><br>Adjusted: 0.76 |
| Duration of total antibiotic treatment                 | 11.4 (8.2)                 | 10.2 (4.6)         | Unadjusted difference<br>1.20 days (-1.42 - 3.82)<br>Adjusted difference<br>1.13 days (-1.37 - 3.62) | 9.5 (4.6)                  | 10.1 (4.9)         | Unadjusted difference<br>-0.62 days (-1.46 - 0.22)<br>Adjusted difference<br>-0.70 days (-1.53 - 0.13)   | Unadjusted: 0.10<br><br>Adjusted: 0.13 |
| Duration of intravenous antibiotic treatment           | 7.3 (8.3)                  | 5.6 (3.9)          | Unadjusted difference<br>1.74 days (-0.81 - 4.29)<br>Adjusted difference<br>1.62 days (-0.84 - 4.08) | 5.2 (4.0)                  | 6.4 (5.0)          | Unadjusted difference -1.14<br>days (-1.95 - -0.34)<br>Adjusted difference<br>-1.25 days (-2.09 - -0.41) | Unadjusted: 0.01<br><br>Adjusted: 0.01 |

## Any CAP pathogen identified

| Endpoints                                              | Any CAP pathogen identified |                      |                                                                                                        | All others                 |                    |                                                                                                          | Interaction p-value                    |
|--------------------------------------------------------|-----------------------------|----------------------|--------------------------------------------------------------------------------------------------------|----------------------------|--------------------|----------------------------------------------------------------------------------------------------------|----------------------------------------|
|                                                        | Predni-<br>sone<br>(n=108)* | Placebo<br>(n=113)** | HR, OR or difference<br>(95% CI)                                                                       | Predni-<br>sone<br>(n=254) | Placebo<br>(n=251) | HR, OR or difference<br>(95% CI)                                                                         |                                        |
| <b>Primary Endpoint</b>                                |                             |                      |                                                                                                        |                            |                    |                                                                                                          |                                        |
| Per protocol, time to clinical stability, median (IQR) | 3.4<br>(2.0 – 7.0)          | 4.4<br>(2.4 – 8.0)   | Unadjusted HR 1.16<br>(0.88 - 1.52)<br>Adjusted HR 1.36<br>(1.03 – 1.80)                               | 2.6<br>(1.9 – 5.0)         | 4.5<br>(2.2 – 8.0) | Unadjusted HR 1.50<br>(1.25 - 1.80)<br>Adjusted HR 1.63<br>(1.36 – 1.96)                                 | Unadjusted: 0.15<br><br>Adjusted: 0.26 |
| <b>Secondary Endpoints</b>                             |                             |                      |                                                                                                        |                            |                    |                                                                                                          |                                        |
| Time to effective hospital discharge                   | 9.1 (6.9)                   | 9.5 (7.2)            | Unadjusted difference<br>-0.32 days (-2.19 – 1.55)<br>Adjusted difference<br>-1.05 days (-2.76 – 0.66) | 7.1 (5.3)                  | 8.4 (5.6)          | Unadjusted difference -1.33<br>days (-2.29 – -0.37)<br>Adjusted difference<br>-1.40 days (-2.29 – -0.52) | Unadjusted: 0.30<br><br>Adjusted: 0.58 |
| Death from any cause                                   | 5 (4.6%)                    | 6 (5.3%)             | Unadjusted OR 0.87<br>(0.26 – 2.92)<br>Adjusted OR 0.42<br>(0.10 – 1.78)                               | 11 (4.3%)                  | 7 (2.8%)           | Unadjusted OR 1.58<br>(0.60 – 4.14)<br>Adjusted OR 1.53<br>(0.55 – 4.25)                                 | Unadjusted: 0.45<br><br>Adjusted: 0.19 |
| ICU admission                                          | 10 (9.3%)<br>***            | 5 (4.4%)<br>***      | Unadjusted OR 2.20<br>(0.73 – 6.67)<br>Adjusted OR 2.29<br>(0.61 – 8.69)                               | 4 (1.6%)                   | 12 (4.8%)          | Unadjusted OR 0.32<br>(0.10 – 1.00)<br>Adjusted OR 0.31<br>(0.10 – 1.00)                                 | Unadjusted: 0.02<br><br>Adjusted: 0.02 |
| Re-hospitalization                                     | 14 (13%)                    | 9 (8%)               | Unadjusted OR 1.72<br>(0.71 – 4.16)<br>Adjusted OR 1.47<br>(0.59 – 3.65)                               | 16 (6.3%)                  | 16 (6.4%)          | Unadjusted OR 0.99<br>(0.48 – 2.02)<br>Adjusted OR 0.95<br>(0.46 – 1.95)                                 | Unadjusted: 0.34<br><br>Adjusted: 0.45 |
| CAP complications                                      | 5 (4.6%)                    | 8 (7.1%)             | Unadjusted OR 0.64<br>(0.20 – 2.01)<br>Adjusted OR 0.49<br>(0.14 – 1.69)                               | 4 (1.6%)                   | 10 (4%)            | Unadjusted OR 0.39<br>(0.12 – 1.25)<br>Adjusted OR 0.37<br>(0.11 – 1.19)                                 | Unadjusted: 0.55<br><br>Adjusted: 0.67 |
| Duration of total antibiotic treatment                 | 10.5 (7.2)                  | 11.2 (6.7)           | Unadjusted difference<br>-0.64 days (-2.54 – 1.26)<br>Adjusted difference<br>-1.03 days (-2.86 – 0.79) | 9.2 (4.2)                  | 9.5 (3.9)          | Unadjusted difference<br>-0.35 days (-1.08 – 0.38)<br>Adjusted difference<br>-0.38 days (-1.10 – 0.34)   | Unadjusted: 0.73<br><br>Adjusted: 0.52 |
| Duration of intravenous antibiotic treatment           | 6.7 (7.3)                   | 7.2 (6.8)            | Unadjusted difference<br>-0.46 days (-2.36 – 1.44)<br>Adjusted difference<br>-0.95 days (-2.79 – 0.89) | 4.6 (3.1)                  | 5.6 (3.7)          | Unadjusted difference<br>-1.02 days (-1.63 – -0.41)<br>Adjusted difference<br>-1.04 days (-1.64 – 0.45)  | Unadjusted: 0.48<br><br>Adjusted: 0.71 |

\* contains the patients with pneumococcal pneumonia (n=53); \*\* contains the patients with pneumococcal pneumonia (n=53); \*\*\* ICU admission rate after removal of patients with pneumococcal pneumonia: 4 of 55 (7%) patients in prednisone arm vs. 3 of 60 (5%) patients in placebo arm

## Bacterial CAP pathogen identified

| Endpoints                                              | Bacterial CAP pathogen identified |                     |                                                                                                        | All others                  |                    |                                                                                                          | Interaction p-value                    |
|--------------------------------------------------------|-----------------------------------|---------------------|--------------------------------------------------------------------------------------------------------|-----------------------------|--------------------|----------------------------------------------------------------------------------------------------------|----------------------------------------|
|                                                        | Predni-<br>sone<br>(n= 78)*       | Placebo<br>(n=87)** | HR, OR or difference (95%<br>CI)                                                                       | Predni-<br>sone<br>(n= 258) | Placebo<br>(n=245) | HR, OR or difference (95% CI)                                                                            |                                        |
| <b>Primary Endpoint</b>                                |                                   |                     |                                                                                                        |                             |                    |                                                                                                          |                                        |
| Per protocol, time to clinical stability, median (IQR) | 3<br>(1.5 - 7.0)                  | 4<br>(2.4 - 9.0)    | Unadjusted HR 1.18<br>(0.86 - 1.63)<br>Adjusted HR 1.54<br>(1.11 - 2.14)                               | 3<br>(2.0 - 5.0)            | 4.5<br>(2.3 - 7.5) | Unadjusted HR 1.38<br>(1.16 - 1.66)<br>Adjusted HR 1.46<br>(1.22 - 1.75)                                 | Unadjusted: 0.46<br><br>Adjusted: 1    |
| <b>Secondary Endpoints</b>                             |                                   |                     |                                                                                                        |                             |                    |                                                                                                          |                                        |
| Time to effective hospital discharge                   | 9.3 (7.3)                         | 10.0 (7.7)          | Unadjusted difference<br>-0.61 days (-2.91 - 1.70)<br>Adjusted difference<br>-1.25 days (-3.37 - 0.87) | 7.2 (5.3)                   | 8.2 (5.4)          | Unadjusted difference<br>-0.95 days (-1.89 - -0.02)<br>Adjusted difference<br>-1.06 days (-1.93 - -0.19) | Unadjusted: 0.75<br><br>Adjusted: 0.98 |
| Death from any cause                                   | 3 (4%)                            | 5 (6%)              | Unadjusted OR 0.66<br>(0.15 - 2.84)<br>Adjusted OR 0.26<br>(0.04 - 1.53)                               | 12 (4.7%)                   | 7 (2.9%)           | Unadjusted OR 1.66<br>(0.64 - 4.28)<br>Adjusted OR 1.61<br>(0.57 - 4.50)                                 | Unadjusted: 0.30<br><br>Adjusted: 0.12 |
| ICU admission                                          | 8 (10%)                           | 4 (5%)              | Unadjusted OR 2.37<br>(0.69 - 8.21)<br>Adjusted OR 2.23<br>(0.52 - 9.56)                               | 6 (2.3%)                    | 11 (4.5%)          | Unadjusted OR 0.51<br>(0.18 - 1.39)<br>Adjusted OR 0.49<br>(0.17 - 1.44)                                 | Unadjusted: 0.06<br><br>Adjusted: 0.06 |
| Re-hospitalization                                     | 10 (13%)                          | 9 (10%)             | Unadjusted OR 1.27<br>(0.49 - 3.32)<br>Adjusted OR 1.07<br>(0.40 - 2.90)                               | 16 (6.2%)                   | 14 (5.7%)          | Unadjusted OR 1.09<br>(0.52 - 2.29)<br>Adjusted OR 1.05<br>(0.50 - 2.20)                                 | Unadjusted: 0.80<br><br>Adjusted: 0.93 |
| CAP complications                                      | 5 (6%)                            | 8 (9%)              | Unadjusted OR 0.68<br>(0.21 - 2.16)<br>Adjusted OR 0.54<br>(0.15 - 1.92)                               | 2 (0.8%)                    | 8 (3.3%)           | Unadjusted OR 0.23<br>(0.05 - 1.10)<br>Adjusted OR 0.22<br>(0.04 - 1.04)                                 | Unadjusted: 0.28<br><br>Adjusted: 0.31 |
| Duration of total antibiotic treatment                 | 11.5 (8.0)                        | 11.8 (7.0)          | Unadjusted difference<br>-0.31 days (-2.69 - 2.07)<br>Adjusted difference<br>-0.77 days (-3.05 - 1.51) | 9.0 (4.0)                   | 9.5 (4.0)          | Unadjusted difference<br>-0.48 days (-1.20 - 0.24)<br>Adjusted difference<br>-0.51 days (-1.21 - 0.21)   | Unadjusted: 0.86<br><br>Adjusted: 0.98 |
| Duration of intravenous antibiotic treatment           | 7.7 (8.3)                         | 7.5 (7.3)           | Unadjusted difference<br>0.14 days (-2.30 - 2.58)<br>Adjusted difference<br>-0.37 days (-2.71 - 1.97)  | 4.6 (3.1)                   | 5.8 (3.9)          | Unadjusted difference<br>-1.16 days (-1.78 - -0.54)<br>Adjusted difference<br>-1.19 days (-1.79 - -0.58) | Unadjusted: 0.15<br><br>Adjusted: 0.21 |

\* contains the patients with pneumococcal pneumonia (n=53); \*\* contains the patients with pneumococcal pneumonia (n=53); \*\*\* ICU admission rate after removal of patients with pneumococcal pneumonia: 2 of 25 (8%) patients in prednisone arm vs. 2 of 34 (6%) patients in placebo arm

## Respiratory Virus

|                                                        | Respiratory virus identified |                     |                                                                                                         | All others                 |                    |                                                                                                        |                                    |
|--------------------------------------------------------|------------------------------|---------------------|---------------------------------------------------------------------------------------------------------|----------------------------|--------------------|--------------------------------------------------------------------------------------------------------|------------------------------------|
| Endpoints                                              | Predni-<br>sone<br>(n= 40)*  | Placebo<br>(n=35)** | HR, OR or difference<br>(95% CI)                                                                        | Predni-<br>sone<br>(n=174) | Placebo<br>(n=183) | HR, OR or difference<br>(95% CI)                                                                       | Interaction p-value                |
| <b>Primary Endpoint</b>                                |                              |                     |                                                                                                         |                            |                    |                                                                                                        |                                    |
| Per protocol, time to clinical stability, median (IQR) | 4.0<br>(3.0 – 6.6)           | 4.4<br>(2.4 – 7)    | Unadjusted HR 1.17<br>(0.74 - 1.86)<br>Adjusted HR 1.21<br>(0.74 -1.98)                                 | 3.0<br>(2.0 – 5.3)         | 4.5<br>(2.3 – 8.0) | Unadjusted HR 1.37<br>(1.10 - 1.70)<br>Adjusted HR 1.52<br>(1.22 – 1.89)                               | Unadjusted: 0.56<br>Adjusted: 0.40 |
| <b>Secondary Endpoints</b>                             |                              |                     |                                                                                                         |                            |                    |                                                                                                        |                                    |
| Time to effective hospital discharge                   | 8.4 (5.5)                    | 8.3 (6.0)           | Unadjusted difference<br>+0.19days (-2.45 – 2.83)<br>Adjusted difference<br>-0.67 days (-3.10 – 1.76)   | 7.3 (6.1)                  | 8.2 (5.8)          | Unadjusted difference<br>-0.86 days (-2.10 – 0.37)<br>Adjusted difference<br>-0.97 days (-2.16 – 0.22) | Unadjusted: 0.48<br>Adjusted: 0.74 |
| Death from any cause                                   | 2 (5%)                       | 1 (3%)              | Unadjusted OR 1.79<br>(0.16 – 20.63)<br>Adjusted OR 0.06<br>(0.0003 – 10.32)                            | 8 (4.7%)                   | 9 (4.9%)           | Unadjusted OR 0.93<br>(0.35 – 2.47)<br>Adjusted OR 0.79<br>(0.26 – 2.40)                               | Unadjusted: 0.63<br>Adjusted: 0.98 |
| ICU admission                                          | 3 (7.5%)                     | 1 (3%)              | Unadjusted OR 2.76<br>(0.27 – 27.79)<br>Adjusted OR 7.42<br>(0.21 – 262.25)                             | 6 (3.4%)                   | 7 (3.8%)           | Unadjusted OR 0.90<br>(0.30 – 2.73)<br>Adjusted OR 1.09<br>(0.32 – 3.69)                               | Unadjusted: 0.39<br>Adjusted: 0.44 |
| Re-hospitalization                                     | 4 (10%)                      | 1 (3%)              | Unadjusted OR 3.78<br>(0.40 – 35.51)<br>Adjusted OR 3. 43<br>(0.34 – 34.38)                             | 12 (7%)                    | 13 (7.1%)          | Unadjusted OR 0.97<br>(0.43 – 2.19)<br>Adjusted OR 0.94<br>(0.41 – 2.17)                               | Unadjusted: 0.26<br>Adjusted: 0.35 |
| CAP complications                                      | 0 (0%)                       | 1 (3%)              | Unadjusted OR 1<br>Adjusted OR 1                                                                        | 4 (2.3%)                   | 10 (5.5%)          | Unadjusted OR 0.41<br>(0.13 – 1.32)<br>Adjusted OR 0.39<br>(0.11 – 1.38)                               | N.A.<br>N.A.                       |
| Duration of total antibiotic treatment                 | 8.8 (3.5)                    | 10.2 (7.5)          | Unadjusted difference<br>-1.35 days (-4.07 – 1.36)<br>Adjusted difference<br>-1.30 days (-4.05 – 1.44)  | 9.8 (6.3)                  | 9.8 (4.6)          | Unadjusted difference<br>0.06 days (-1.11 – 1.23)<br>Adjusted difference<br>0.002 days (-1.14 – 1.15)  | Unadjusted: 0.34<br>Adjusted: 0.30 |
| Duration of intravenous antibiotic treatment           | 5.0 (3.2)                    | 6.7 (8.0)           | Unadjusted difference<br>-1.73 days (-4.47 – 1.01)<br>Adjusted difference<br>-1.83 days (-4. 63 – 0.96) | 5.5 (6.0)                  | 5.9 (4.4)          | Unadjusted difference<br>-0.42 days (-1.53 – 0.69)<br>Adjusted difference<br>-0.48 days (-1.56 – 0.60) | Unadjusted: 0.35<br>Adjusted: 0.24 |

\* contains the patients with influenza virus (n=11); \*\* contains the patients with influenza virus (n=13)

## Influenza virus

|                                                        | Influenza virus           |                     |                                                                                                          | All others                 |                    |                                                                                                        |                                         |
|--------------------------------------------------------|---------------------------|---------------------|----------------------------------------------------------------------------------------------------------|----------------------------|--------------------|--------------------------------------------------------------------------------------------------------|-----------------------------------------|
| Endpoints                                              | Predni-<br>sone<br>(n=11) | Placebo<br>(n=13)   | HR, OR or difference<br>(95% CI)                                                                         | Predni-<br>sone<br>(n=203) | Placebo<br>(n=205) | HR, OR or difference<br>(95% CI)                                                                       | Interaction p-value                     |
| <b>Primary Endpoint</b>                                |                           |                     |                                                                                                          |                            |                    |                                                                                                        |                                         |
| Per protocol, time to clinical stability, median (IQR) | 4.0<br>(1.4 - 7.0)        | 5.0<br>(3.0 - 10.4) | Unadjusted HR 1.26<br>(0.54 - 2.92)<br>Adjusted HR 4.50<br>(1.17 - 17.25)                                | 3.0<br>(2.0 - 5.5)         | 4.4<br>(2.3 - 7.5) | Unadjusted HR 1.33<br>(1.09 - 1.63)<br>Adjusted HR 1.45<br>(1.18 - 1.77)                               | Unadjusted: 0.94<br><br>Adjusted: 0.91  |
| <b>Secondary Endpoints</b>                             |                           |                     |                                                                                                          |                            |                    |                                                                                                        |                                         |
| Time to effective hospital discharge                   | 9.2 (9.4)                 | 10.4 (8.0)          | Unadjusted difference<br>-1.57 days (-8.78 - 5.65)<br>Adjusted difference<br>-2.24 days (-9.61 - 5.12)   | 7.5 (5.8)                  | 8.1 (5.8)          | Unadjusted difference<br>-0.60 days (-1.71 - 0.52)<br>Adjusted difference<br>-0.80 days (-1.86 - 0.27) | Unadjusted: 0.70<br><br>Adjusted: 0.56  |
| Death from any cause                                   | 1 (10%)                   | 1 (8%)              | Unadjusted OR 1.2<br>(0.07 - 21.72)<br>Adjusted OR 0.13<br>(N.A.)                                        | 9<br>(4.4%)                | 9 (4.4%)           | Unadjusted OR 1.01<br>(0.39 - 2.60)<br>Adjusted OR 0.79<br>(0.27 - 2.33)                               | Unadjusted: 0.91<br><br>Adjusted: 0.76  |
| ICU admission                                          | 1 (10%)                   | 1 (8%)              | Unadjusted OR 1.2<br>(0.07 - 21.72)<br>Adjusted OR N.A.                                                  | 8<br>(3.9%)                | 7 (3.4%)           | Unadjusted OR 1.16<br>(0.41 - 3.26)<br>Adjusted OR 1.47<br>(0.47 - 4.64)                               | Unadjusted: 0.98<br><br>Adjusted: 0.77  |
| Re-hospitalization                                     | 1 (10%)                   | 1 (8%)              | Unadjusted OR 1.20<br>(0.07 - 21.72)<br>Adjusted OR 1.01<br>(0.03 - 37.26)                               | 15<br>(7.4%)               | 13 (6.3%)          | Unadjusted OR 1.18<br>(0.55 - 2.54)<br>Adjusted OR 1.11<br>(0.51 - 2.44)                               | Unadjusted: 0.99<br><br>Adjusted: 0.98  |
| CAP complications                                      | 0 (0%)                    | 1 (8%)              | Unadjusted OR 1<br>(N.A.)<br>Adjusted OR 1<br>(N.A.)                                                     | 4 (2%)                     | 10 (4.9%)          | Unadjusted OR 0.39<br>(0.12 - 1.27)<br>Adjusted OR 0.37<br>(0.10 - 1.30)                               | Unadjusted: N.A.<br><br>Adjusted: N.A.  |
| Duration of total antibiotic treatment                 | 7.8 (3.4)                 | 13.0 (10.7)         | Unadjusted difference<br>-4.80 days (-12.21 - 2.61)<br>Adjusted difference<br>-4.63 days (-13.65 - 4.39) | 9.7 (6)                    | 9.6 (4.5)          | Unadjusted difference<br>0.08 days (-0.97 - 1.14)<br>Adjusted difference<br>0.02 days (-1.02 - 1.06)   | Unadjusted: 0.04<br><br>Adjusted: 0.04  |
| Duration of intravenous antibiotic treatment           | 3.4 (2.9)                 | 9.8 (11.6)          | Unadjusted difference<br>-6.13 days (-13.60 - 1.33)<br>Adjusted difference<br>-6.13 days (-15.15 - 2.88) | 5.5 (5.7)                  | 5.8 (4.3)          | Unadjusted difference<br>-0.30 days (-1.30 - 0.70)<br>Adjusted difference<br>-0.39 days (-1.36 - 0.58) | Unadjusted: 0.01<br><br>Adjusted: <0.01 |

## **2. Analysis by antimicrobial subgroup**



## Beta-lactam + Macrolide

|                                                        | Beta-lactam + Macrolide    |                    |                                                                                                          | All others                 |                    |                                                                                                         |                                        |
|--------------------------------------------------------|----------------------------|--------------------|----------------------------------------------------------------------------------------------------------|----------------------------|--------------------|---------------------------------------------------------------------------------------------------------|----------------------------------------|
| Endpoints                                              | Predni-<br>sone<br>(n=205) | Placebo<br>(n=199) | HR, OR or difference<br>(95% CI)                                                                         | Predni-<br>sone<br>(n=156) | Placebo<br>(n=162) | HR, OR or difference<br>(95% CI)                                                                        | Interaction p-value                    |
| <b>Primary Endpoint</b>                                |                            |                    |                                                                                                          |                            |                    |                                                                                                         |                                        |
| Per protocol, time to clinical stability, median (IQR) | 3.0<br>(2.0 – 6.0)         | 5<br>(2.3 – 8.0)   | Unadjusted HR 1.32<br>(1.08 - 1.61)<br>Adjusted HR 1.52<br>(1.23 – 1.86)                                 | 2.4<br>(1.4 – 4.9)         | 4<br>(2.0 – 7.0)   | Unadjusted HR 1.42<br>(1.13 - 1.77)<br>Adjusted HR 1.46<br>(1.16 – 1.83)                                | Unadjusted: 0.46<br><br>Adjusted: 0.88 |
| <b>Secondary Endpoints</b>                             |                            |                    |                                                                                                          |                            |                    |                                                                                                         |                                        |
| Time to effective hospital discharge                   | 8.0 (5.9)                  | 8.7 (6.3)          | Unadjusted difference<br>-0.69 days (-1.90 – 0.51)<br>Adjusted difference<br>-1.25 days (-2.36 – -0.14)  | 7.3 (5.9)                  | 8.7 (5.9)          | Unadjusted difference<br>-1.34 days (-2.63 – 0.46)<br>Adjusted difference<br>-1.14 days (-2.36 – 0.08)  | Unadjusted: 0.47<br><br>Adjusted: 0.96 |
| Death from any cause                                   | 12 (5.9%)                  | 9 (4.5%)           | Unadjusted OR 1.31<br>(0.54 – 3.19)<br>Adjusted OR 0.93<br>(0.34 – 2.54)                                 | 4 (2.6%)                   | 4 (2.5%)           | Unadjusted OR 1.04<br>(0.26 – 4.23)<br>Adjusted OR 1.07<br>(0.25 – 4.57)                                | Unadjusted: 0.78<br><br>Adjusted: 0.96 |
| ICU admission                                          | 8 (3.9%)                   | 13 (6.5%)          | Unadjusted OR 0.58<br>(0.24 – 1.43)<br>Adjusted OR 0.53<br>(0.20 – 1.40)                                 | 6 (3.8%)                   | 4 (2.5%)           | Unadjusted OR 1.58<br>(0.44 – 5.71)<br>Adjusted OR 1.59<br>(0.36 – 7.06)                                | Unadjusted: 0.21<br><br>Adjusted: 0.17 |
| Re-hospitalization                                     | 14 (6.8%)                  | 18 (9%)            | Unadjusted OR 0.74<br>(0.36 – 1.53)<br>Adjusted OR 0.67<br>(0.32 – 1.40)                                 | 16 (10.3%)                 | 7 (4.3%)           | Unadjusted OR 2.53<br>(1.01 – 6.33)<br>Adjusted OR 2.52<br>(0.98 – 6.48)                                | Unadjusted: 0.04<br><br>Adjusted: 0.03 |
| CAP complications                                      | 4 (2%)                     | 12 (6%)            | Unadjusted OR 0.31<br>(0.10 – 0.98)<br>Adjusted OR 0.25<br>(0.08 – 0.83)                                 | 5 (3.2%)                   | 6 (3.7%)           | Unadjusted OR 0.86<br>(0.26 – 2.88)<br>Adjusted OR 0.86<br>(0.25 – 2.95)                                | Unadjusted: 0.23<br><br>Adjusted: 0.19 |
| Duration of total antibiotic treatment                 | 9.7 (4.2)                  | 10.2 (4.7)         | Unadjusted difference<br>-0.46 days (-1.34 – 0.42)<br>Adjusted difference<br>-0.60 days (-1.46 – 0.26)   | 9.4 (6.5)                  | 9.8 (5.3)          | Unadjusted difference<br>-0.41 days (-1.78 – 0.95)<br>Adjusted difference<br>-0.27 days (1.64 – 1.09)   | Unadjusted: 0.95<br><br>Adjusted: 0.81 |
| Duration of intravenous antibiotic treatment           | 5.4 (3.8)                  | 6.3 (4.7)          | Unadjusted difference<br>-0.96 days (-1.80 – -0.12)<br>Adjusted difference<br>-1.19 days (-1.99 – -0.38) | 5.0 (6.1)                  | 5.8 (5.2)          | Unadjusted difference<br>-0.75 days (-2.02 – 0.53)<br>Adjusted difference –<br>0.57 days (-1.81 – 0.68) | Unadjusted: 0.78<br><br>Adjusted: 0.48 |

## Beta-lactam only

|                                                        | Beta-lactam only           |                    |                                                                                                        | All others                 |                    |                                                                                                         |                                        |
|--------------------------------------------------------|----------------------------|--------------------|--------------------------------------------------------------------------------------------------------|----------------------------|--------------------|---------------------------------------------------------------------------------------------------------|----------------------------------------|
| Endpoints                                              | Predni-<br>sone<br>(n=103) | Placebo<br>(n=96)  | HR, OR or difference<br>(95% CI)                                                                       | Predni-<br>sone<br>(n=258) | Placebo<br>(n=265) | HR, OR or difference<br>(95% CI)                                                                        | Interaction p-value                    |
| <b>Primary Endpoint</b>                                |                            |                    |                                                                                                        |                            |                    |                                                                                                         |                                        |
| Per protocol, time to clinical stability, median (IQR) | 2.0<br>(1.3 - 4.4)         | 3.0<br>(2.0 - 6.0) | Unadjusted HR 1.28<br>(0.97 - 1.71)<br>Adjusted HR 1.28<br>(0.96 - 1.71)                               | 3.0<br>(2.0 - 6.0)         | 5.0<br>(2.4 - 8.4) | Unadjusted HR 1.36<br>(1.14 - 1.63)<br>Adjusted HR 1.58<br>(1.32 - 1.89)                                | Unadjusted: 0.88<br><br>Adjusted: 0.33 |
| <b>Secondary Endpoints</b>                             |                            |                    |                                                                                                        |                            |                    |                                                                                                         |                                        |
| Time to effective hospital discharge                   | 6.8 (4.3)                  | 7.6 (4.4)          | Unadjusted difference<br>-0.81 days (-2.02 - 0.39)<br>Adjusted difference<br>-0.65 days (-1.80 - 0.50) | 8.1 (6.4)                  | 9.1 (6.6)          | Unadjusted difference<br>-1 day (-2.12 - 0.12)<br>Adjusted difference<br>-1.45 days (-2.49 - -0.41)     | Unadjusted: 0.85<br><br>Adjusted: 0.36 |
| Death from any cause                                   | 2 (1.9%)                   | 3 (3.1%)           | Unadjusted OR 0.61<br>(0.10 - 3.76)<br>Adjusted OR 0.64<br>(0.10 - 4.18)                               | 14 (5.4%)                  | 10 (3.8%)          | Unadjusted OR 1.46<br>(0.64 - 3.36)<br>Adjusted OR 1.04<br>(0.41 - 2.62)                                | Unadjusted: 0.39<br><br>Adjusted: 0.65 |
| ICU admission                                          | 1 (1%)                     | 0 (0%)             | Unadjusted OR 1<br><br>Adjusted OR N.A.                                                                | 13 (5.0%)                  | 17 (6.4%)          | Unadjusted OR 0.77<br>(0.37 - 1.63)<br>Adjusted OR 0.64<br>(0.28 - 1.44)                                | N.A.                                   |
| Re-hospitalization                                     | 7 (6.8%)                   | 1 (1%)             | Unadjusted OR 6.93<br>(0.84 - 57.39)<br>Adjusted OR 6.38<br>(0.76 - 53.84)                             | 23 (8.9%)                  | 24 (9.1%)          | Unadjusted OR 0.98<br>(0.54 - 1.79)<br>Adjusted OR 0.87<br>(0.47 - 1.61)                                | Unadjusted: 0.08<br><br>Adjusted: 0.07 |
| CAP complications                                      | 3 (2.9%)                   | 3 (3.1%)           | Unadjusted OR 0.93<br>(0.18 - 4.72)<br>Adjusted OR 0.93<br>(0.17 - 4.94)                               | 6 (2.3%)                   | 15 (5.7%)          | Unadjusted OR 0.40<br>(0.15 - 1.04)<br>Adjusted OR 0.31<br>(0.11 - 0.85)                                | Unadjusted: 0.38<br><br>Adjusted: 0.25 |
| Duration of total antibiotic treatment                 | 8.5 (3.6)                  | 8.8 (3.6)          | Unadjusted difference<br>-0.31 days (-1.36 - 0.75)<br>Adjusted difference<br>-0.17 days (-1.22 - 0.88) | 10.0 (5.8)                 | 10.4 (5.3)         | Unadjusted difference<br>-0.41 days (-1.38 - 0.55)<br>Adjusted difference<br>-0.61 days (-1.55 - 0.34)  | Unadjusted: 0.91<br><br>Adjusted: 0.63 |
| Duration of intravenous antibiotic treatment           | 4.5 (2.8)                  | 5.3 (3.2)          | Unadjusted difference<br>-0.73 days (-1.59 - 0.13)<br>Adjusted difference<br>-0.58 days (-1.43 - 0.27) | 5.5 (5.5)                  | 6.4 (5.4)          | Unadjusted difference<br>-0.87 days (-1.81 - 0.06)<br>Adjusted difference<br>-1.11 days (-2.02 - -0.21) | Unadjusted: 0.86<br><br>Adjusted: 0.47 |

## All other antibiotics

|                                                        | All other antibiotics     |                    |                                                                                                        | All others                 |                    |                                                                                                          |                                        |
|--------------------------------------------------------|---------------------------|--------------------|--------------------------------------------------------------------------------------------------------|----------------------------|--------------------|----------------------------------------------------------------------------------------------------------|----------------------------------------|
| Endpoints                                              | Predni-<br>sone<br>(n=47) | Placebo<br>(n=62)  | HR, OR or difference<br>(95% CI)                                                                       | Predni-<br>Sone<br>(n=314) | Placebo<br>(n=299) | HR, OR or difference<br>(95% CI)                                                                         | Interaction p-value                    |
| <b>Primary Endpoint</b>                                |                           |                    |                                                                                                        |                            |                    |                                                                                                          |                                        |
| Per protocol, time to clinical stability, median (IQR) | 3.0<br>(1.4 – 6.0)        | 5.0<br>(3.0 – 9.0) | Unadjusted HR 1.47<br>(1.00 - 2.17)<br>Adjusted HR 1.78<br>(1.18 – 2.69)                               | 3.0<br>(2.0 – 5.4)         | 4.3<br>(2.0 – 7.6) | Unadjusted HR 1.31<br>(1.11 - 1.54)<br>Adjusted HR 1.42<br>(1.20 – 1.67)                                 | Unadjusted: 0.60<br><br>Adjusted: 0.44 |
| <b>Secondary Endpoints</b>                             |                           |                    |                                                                                                        |                            |                    |                                                                                                          |                                        |
| Time to effective hospital discharge                   | 9.0 (8.3)                 | 10.4 (7.4)         | Unadjusted difference<br>-1.40 days (-4.40 – 1.59)<br>Adjusted difference<br>-1.93 days (-4.77 – 0.92) | 7.5 (5.5)                  | 8.3 (5.8)          | Unadjusted difference<br>-0.81 days (-1.70 – 0.08)<br>Adjusted difference<br>-1.04 days (-1.86 – -0.21)  | Unadjusted: 0.64<br><br>Adjusted: 0.55 |
| Death from any cause                                   | 2 (4%)                    | 1 (2%)             | Unadjusted OR 2.71<br>(0.24 – 30.83)<br>Adjusted OR 1.61<br>(0.11 – 23.7)                              | 14 (4.5%)                  | 12 (4%)            | Unadjusted OR 1.12<br>(0.51 – 2.45)<br>Adjusted OR 0.92<br>(0.39 – 2.19)                                 | Unadjusted: 0.50<br><br>Adjusted: 0.62 |
| ICU admission                                          | 5 (11%)                   | 4 (6%)             | Unadjusted OR 1.73<br>(0.44 – 6.82)<br>Adjusted OR 0.94<br>(0.17 – 5.33)                               | 9 (2.9%)                   | 13 (4.3%)          | Unadjusted OR 0.65<br>(0.27 – 1.54)<br>Adjusted OR 0.67<br>(0.26 – 1.70)                                 | Unadjusted: 0.24<br><br>Adjusted: 0.53 |
| Re-hospitalization                                     | 9 (19%)                   | 6 (10%)            | Unadjusted OR 2.09<br>(0.73 – 6.72)<br>Adjusted OR 1.70<br>(0.51 – 5.69)                               | 21 (6.7%)                  | 19 (6.4%)          | Unadjusted OR 1.06<br>(0.56 – 2.01)<br>Adjusted OR 0.98<br>(0.51 – 1.87)                                 | Unadjusted: 0.26<br><br>Adjusted: 0.29 |
| CAP complications                                      | 2 (4%)                    | 3 (5%)             | Unadjusted OR 0.87<br>(0.14 – 5.45)<br>Adjusted OR 0.14<br>(0.003 – 5.05)                              | 7 (2.2%)                   | 15 (5%)            | Unadjusted OR 0.43<br>(0.17 – 1.07)<br>Adjusted OR 0.40<br>(0.16 – 1)                                    | Unadjusted: 0.50<br><br>Adjusted: 0.67 |
| Duration of total antibiotic treatment                 | 12.7 (9.6)                | 12.0 (6.3)         | Unadjusted difference<br>0.71 days (-2.38 – 3.81)<br>Adjusted difference<br>0.46 days (-2.72 – 3.65)   | 9.1 (4.2)                  | 9.6 (4.5)          | Unadjusted difference<br>-0.48 days (-1.19 – 0.23)<br>Adjusted difference<br>-0.54 days (-1.22 – 0.15)   | Unadjusted: 0.27<br><br>Adjusted: 0.41 |
| Duration of intravenous antibiotic treatment           | 6.7 (10.0)                | 6.9 (7.1)          | Unadjusted difference<br>-0.20 days (-3.49 – 3.09)<br>Adjusted difference<br>-0.74 days (-3.98 – 2.50) | 5 (3.5)                    | 5.9 (4.3)          | Unadjusted difference<br>-0.90 days (-1.54 – -0.27)<br>Adjusted difference<br>-0.98 days (-1.59 – -0.37) | Unadjusted: 0.50<br><br>Adjusted: 0.66 |

## Sensitivity Analysis: Patients who received any macrolide

|                                                        | Patients who <u>ever</u> received a macrolide |                    |                                                                                                         | All others                 |                    |                                                                                                        |                                        |
|--------------------------------------------------------|-----------------------------------------------|--------------------|---------------------------------------------------------------------------------------------------------|----------------------------|--------------------|--------------------------------------------------------------------------------------------------------|----------------------------------------|
| Endpoints                                              | Predni-<br>sone<br>(n=225)                    | Placebo<br>(n=234) | HR, OR or difference<br>(95% CI)                                                                        | Predni-<br>Sone<br>(n=136) | Placebo<br>(n=127) | HR, OR or difference<br>(95% CI)                                                                       | Interaction p-value                    |
| <b>Primary Endpoint</b>                                |                                               |                    |                                                                                                         |                            |                    |                                                                                                        |                                        |
| Per protocol, time to clinical stability, median (IQR) | 3.0<br>(2.0 - 6.0)                            | 5.0<br>(2.0 - 8.4) | Unadjusted HR 1.36<br>(1.12 - 1.64)<br>Adjusted HR 1.58<br>(1.30 - 1.92)                                | 2.0<br>(1.4 - 4.5)         | 3.4<br>(2.0 - 6.0) | Unadjusted HR 1.31<br>(1.02 - 1.67)<br>Adjusted HR 1.31<br>(1.02 - 1.68)                               | Unadjusted: 0.98<br><br>Adjusted: 0.98 |
| <b>Secondary Endpoints</b>                             |                                               |                    |                                                                                                         |                            |                    |                                                                                                        |                                        |
| Time to effective hospital discharge                   | 8.1 (6.3)                                     | 9.0 (6.7)          | Unadjusted difference<br>-0.84 days (-2.04 - 0.35)<br>Adjusted difference<br>-1.40 days (-2.50 - -0.29) | 7.0 (5.1)                  | 8.1 (4.9)          | Unadjusted difference<br>-1.13 days (-2.35 - 0.08)<br>Adjusted difference<br>-0.85 dys (-2 - 0.30)     | Unadjusted: 0.75<br><br>Adjusted: 0.59 |
| Death from any cause                                   | 13 (5.8%)                                     | 10 (4.3%)          | Unadjusted OR 1.37<br>(0.59 - 3.20)<br>Adjusted OR 0.90<br>(0.35 - 2.34)                                | 3 (2.2%)                   | 3 (2.4%)           | Unadjusted OR 0.93<br>(0.18 - 4.71)<br>Adjusted OR 1.09<br>(0.20 - 5.90)                               | Unadjusted: 0.68<br><br>Adjusted: 0.89 |
| ICU admission                                          | 11 (4.9%)                                     | 15 (6.4%)          | Unadjusted OR 0.75<br>(0.34 - 1.67)<br>Adjusted OR 0.62<br>(0.26 - 1.48)                                | 3 (2.2%)                   | 2 (1.6%)           | Unadjusted OR 1.41<br>(0.23 - 8.58)<br>Adjusted OR 1.41<br>(0.18 - 11.06)                              | Unadjusted: 0.53<br><br>Adjusted: 0.28 |
| Re-hospitalization                                     | 19 (8.4%)                                     | 22 (9.4%)          | Unadjusted OR 0.89<br>(0.47 - 1.69)<br>Adjusted OR 0.80<br>(0.41 - 1.54)                                | 11 (8.1%)                  | 3 (2.4%)           | Unadjusted OR 3.64<br>(0.99 - 13.35)<br>Adjusted OR 3.57<br>(0.94 - 13.53)                             | Unadjusted: 0.06<br><br>Adjusted: 0.04 |
| CAP complications                                      | 6 (2.7%)                                      | 14 (6.0%)          | Unadjusted OR 0.43<br>(0.16 - 1.14)<br>Adjusted OR 0.34<br>(0.12 - 0.96)                                | 3 (2.2%)                   | 4 (3.1%)           | Unadjusted OR 0.69<br>(0.15 - 3.16)<br>Adjusted OR 0.67<br>(0.14 - 3.17)                               | Unadjusted: 0.60<br><br>Adjusted: 0.47 |
| Duration of total antibiotic treatment                 | 10.1 (5.7)                                    | 10.5 (5.2)         | Unadjusted: -0.38<br>(-1.40 - 0.64)<br>Adjusted: -0.61<br>(-1.62 - 0.39)                                | 8.6 (4.4)                  | 9 (4.2)            | Unadjusted: -0.40<br>(-1.49 - 0.70)<br>Adjusted: -0.24<br>(-1.32 - 0.84)                               | Unadjusted: 0.99<br><br>Adjusted: 0.72 |
| Duration of intravenous antibiotic treatment           | 5.7 (5.5)                                     | 6.6 (5.5)          | Unadjusted difference<br>-0.96 days (-1.97- 0.06)<br>Adjusted difference<br>-1.25 days (-2.24 - -0.26)  | 4.5 (3.4)                  | 5.0 (3.3)          | Unadjusted difference<br>-0.58 days (-1.43 - 0.26)<br>Adjusted difference<br>-0.38 days (-1.21 - 0.45) | Unadjusted: 0.63<br><br>Adjusted: 0.27 |

### 3. Analysis by initial serum procalcitonin level

| Endpoints                                              | Patients with procalcitonin <u>above</u> the median population level |                    |                                                                                                          | All others                 |                    |                                                                                                         | Interaction p-value                    |
|--------------------------------------------------------|----------------------------------------------------------------------|--------------------|----------------------------------------------------------------------------------------------------------|----------------------------|--------------------|---------------------------------------------------------------------------------------------------------|----------------------------------------|
|                                                        | Predni-<br>sone<br>(n=141)                                           | Placebo<br>(n=148) | HR, OR or difference<br>(95% CI)                                                                         | Predni-<br>Sone<br>(n=148) | Placebo<br>(n=158) | HR, OR or difference<br>(95% CI)                                                                        |                                        |
| <b>Primary Endpoint</b>                                |                                                                      |                    |                                                                                                          |                            |                    |                                                                                                         |                                        |
| Per protocol, time to clinical stability, median (IQR) | 2.6<br>(1.9 - 5.4)                                                   | 4.5<br>(2.5 - 8.7) | Unadjusted HR 1.54<br>(1.21 - 1.96)<br>Adjusted HR 1.75<br>(1.37 - 2.25)                                 | 2.4<br>(1.5 - 4.5)         | 4.0<br>(2.0 - 7.0) | Unadjusted HR 1.40<br>(1.11 - 1.76)<br>Adjusted HR 1.44<br>(1.14 - 1.82)                                | Unadjusted: 0.53<br><br>Adjusted: 0.51 |
| <b>Secondary Endpoints</b>                             |                                                                      |                    |                                                                                                          |                            |                    |                                                                                                         |                                        |
| Time to effective hospital discharge                   | 7.6 (5.9)                                                            | 9.1 (6.4)          | Unadjusted difference<br>-1.57 days (-3.01 - -0.14)<br>Adjusted difference<br>-1.84 days (-3.17 - -0.53) | 6.8 (5.7)                  | 8.2 (6.2)          | Unadjusted difference<br>-1.40 days (-2.74 - -0.05)<br>Adjusted difference<br>-1.26 days (-2.54 - 0.01) | Unadjusted: 0.86<br><br>Adjusted: 0.64 |
| Death from any cause                                   | 6 (4.3%)                                                             | 6 (4.1%)           | Unadjusted OR 1.05<br>(0.33 - 3.34)<br>Adjusted OR 0.75<br>(0.20 - 2.84)                                 | 4 (2.7%)                   | 5 (3.2%)           | Unadjusted OR 0.85<br>(0.22 - 3.23)<br>Adjusted OR 0.97<br>(0.23 - 4.08)                                | Unadjusted: 0.81<br><br>Adjusted: 0.98 |
| ICU admission                                          | 6 (4.3%)                                                             | 9 (6.1%)           | Unadjusted OR 0.69<br>(0.24 - 1.98)<br>Adjusted OR 0.68<br>(0.22 - 2.17)                                 | 3 (2%)                     | 5 (3.2%)           | Unadjusted OR 0.63<br>(0.15 - 2.70)<br>Adjusted OR 0.56<br>(0.12 - 2.58)                                | Unadjusted: 0.93<br><br>Adjusted: 0.87 |
| Re-hospitalization                                     | 12 (8.5%)                                                            | 7 (4.7%)           | Unadjusted OR 1.87<br>(0.72 - 4.90)<br>Adjusted OR 1.60<br>(0.59 - 4.30)                                 | 11 (7.4%)                  | 13 (8.2%)          | Unadjusted OR 0.90<br>(0.39 - 2.07)<br>Adjusted OR 0.98<br>(0.41 - 2.34)                                | Unadjusted: 0.26<br><br>Adjusted: 0.30 |
| CAP complications                                      | 3 (2.1%)                                                             | 11 (7.4%)          | Unadjusted OR 0.27<br>(0.07 - 0.99)<br>Adjusted OR 0.25<br>(0.07 - 0.96)                                 | 4 (2.7%)                   | 6 (3.8%)           | Unadjusted OR 0.70<br>(0.19 - 2.54)<br>Adjusted OR 0.75<br>(0.20 - 2.83)                                | Unadjusted: 0.31<br><br>Adjusted: 0.28 |
| Duration of total antibiotic treatment                 | 9.5 (4.4)                                                            | 11.1 (5.8)         | Unadjusted difference<br>-1.61 days (-2.85 - -0.38)<br>Adjusted difference<br>-1.82 days (-3.03 - -0.62) | 8.9 (4.9)                  | 9 (4.4)            | Unadjusted difference<br>-0.11 days (-1.18 - 0.97)<br>Adjusted difference<br>-0.03 days (-1.11 - 1.06)  | Unadjusted: 0.07<br><br>Adjusted: 0.04 |
| Duration of intravenous antibiotic treatment           | 5.5 (3.6)                                                            | 7.2 (6.1)          | Unadjusted difference<br>-1.80 days (-2.99 - -0.60)<br>Adjusted difference<br>-2.01 days (-3.16 - -0.85) | 4.4 (4.5)                  | 5 (3.7)            | Unadjusted difference<br>-0.63 days (-1.57 - 0.31)<br>Adjusted difference<br>-0.53 days (-1.46 - 0.40)  | Unadjusted: 0.13<br><br>Adjusted: 0.07 |
